# Supplementary material for: Role of Glucokinase in the Subcellular Localization of Glucokinase Regulatory Protein
Source: Int J Mol Sci. 2015 Apr 2;16(4):7377–93. doi: 10.3390/ijms16047377 (PMC4425023; doi:10.3390/ijms16047377)
Supplement: Supplementary file 1 [file ijms-16-07377-s001.pdf]

## Supplementary Information

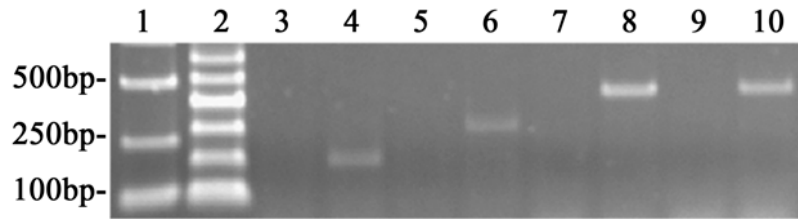

**Figure S1.** Expression of endogenous and introduced *Gck* and *Gckr* mRNAs in L-02 cells and expression of *Gck* and *Gckr* from transfected plasmids in cells. *Gck* and *Gckr* mRNA levels were examined by PCR with primers that distinguished between the plasmid and endogenous gene-derived mRNAs. **Lane 1:** Marker V; **Lane 2:** PCR marker; **Lane 3:** No *Gck* mRNA (L-02 cells with primers in the *Gck* CDS region); **Lane 4:** *Gck* mRNA (L-02 cells transfected with GCK expressing plasmids with primers in the *Gck* CDS region); **Lane 5:** No *Gck* mRNA (L-02 cells with one primer in the *Gck* CDS region and one in the vector); **Lane 6:** *Gck* mRNA (L-02 cells transfected with GCK expressing plasmids with one primer in the *Gck* CDS region and the other in the vector); **Lane 7:** No *Gckr* mRNA (L-02 cells with primers in the *Gckr* CDS region); **Lane 8:** *Gckr* mRNA (L-02 cells transfected with GCKR expressing plasmids with primers in *Gckr* CDS region); **Lane 9:** No *Gckr* mRNA (L-02 cells with one primer in the *Gckr* CDS region and the other in the vector); **Lane 10:** *Gckr* mRNA (L-02 cells transfected with GCKR expressing plasmids with one primer in the *Gckr* CDS region and the other in the vector).

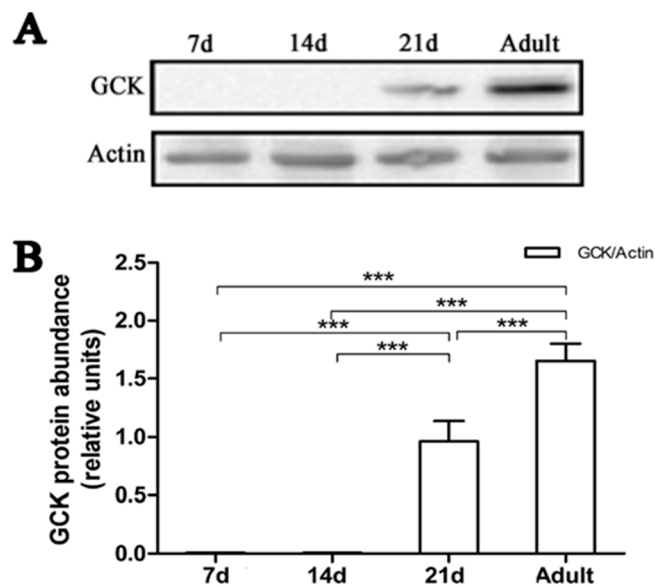

**Figure S2.** Glucokinase expression levels in the liver of the rat at different ages. (A) Representative Western blot for GCK, with  $\beta$ -actin used as a loading control, from liver extracts of rats at 7, 14, and 21-days of age and adults; and (B) Quantification of the immunoblots for glucokinase from rats of different ages. All rats were fed ad-lib. Relative units of GCK protein abundance in the Western blots were the abundance of GCK normalized to level of  $\beta$ -actin from the same extract. \*\*\*  $p < 0.001$ . Data presented as means  $\pm$  S.D. ( $n = 4$ ).

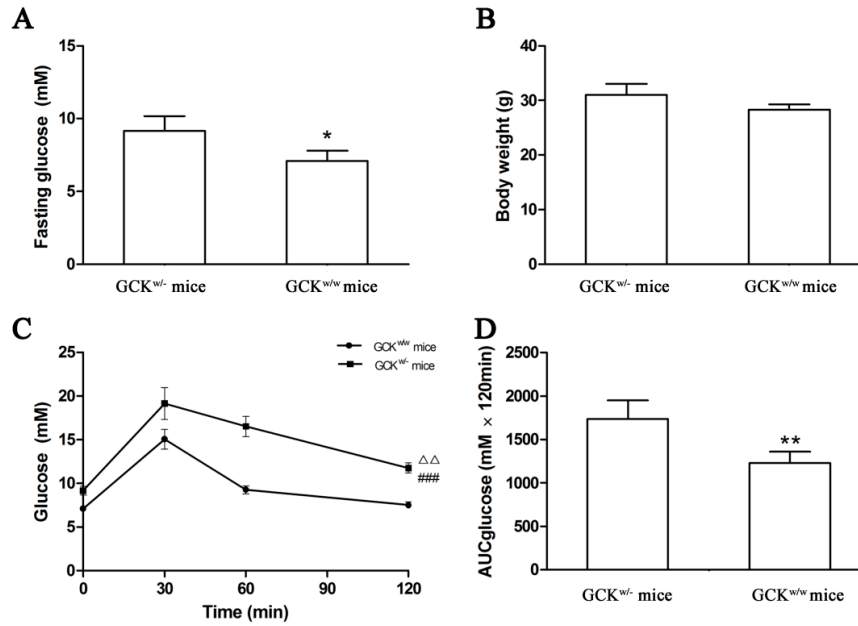

**Figure S3.** Diabetic character of the liver-specific *Gck* gene knockout mice. (A) Fasting blood glucose concentrations; (B) Body weights; (C) Intraperitoneal glucose tolerance tests; and (D) Total AUC calculated from IPGTT tests, are shown for *Gck*<sup>w/-</sup> and *Gck*<sup>w/w</sup> mice. Fasting blood glucose was obtained after an 8 h fast, with glucose levels measured at 0, 30, 60 and 120 min after the glucose injection for the IPGTT. \*  $p < 0.05$ , \*\*  $p < 0.01$  vs. age-matched *Gck*<sup>w/-</sup> mice.  $\Delta\Delta$   $p < 0.01$  vs. age-matched *Gck*<sup>w/-</sup> mice at 0 min. ###  $p < 0.001$  vs. age-matched *Gck*<sup>w/w</sup> mice at 120 min. Data are presented as means  $\pm$  S.D. ( $n = 4$ ).

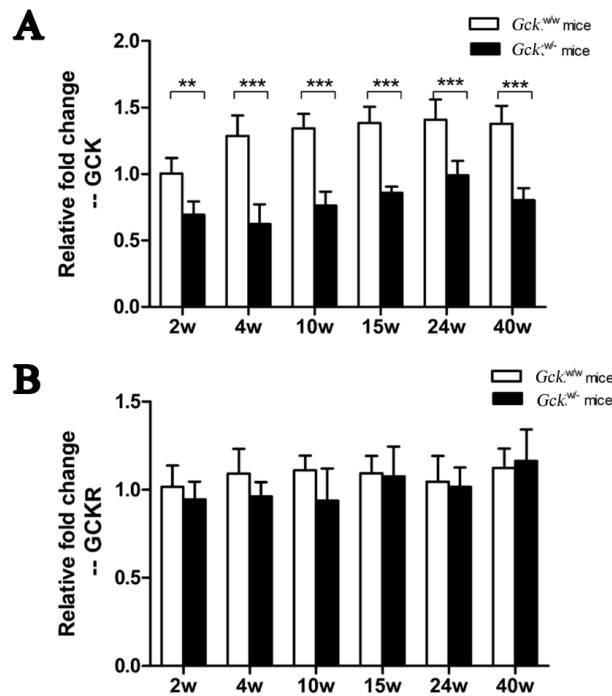

**Figure S4.** *Gck* and *Gckr* mRNA levels in the liver of *Gck*<sup>w/-</sup> and *Gck*<sup>w/w</sup> mice of different ages. (A) *Gck* and (B) *Gckr* mRNA levels were examined in the livers of wild-type (open bars) and liver-specific *Gck* knockout (solid bars) mice at 2, 4, 10, 15, 24, and 40 weeks of age by real-time PCR. \*\*  $p < 0.01$ , \*\*\*  $p < 0.001$ . Data are presented as means  $\pm$  S.D. ( $n = 4$ ).
